# Supplementary material
Source: Springer Nature journal article supplement (https://www.springermedizin.de/resource/supplementary/12935_2006_149_MOESM4_ESM.pdf/9541188)

**A**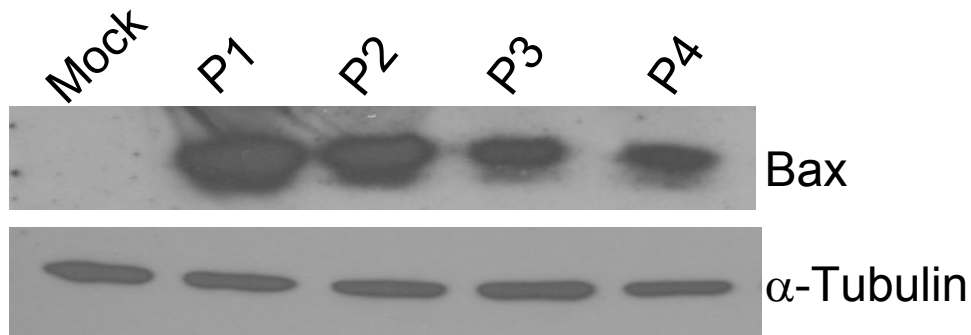**B**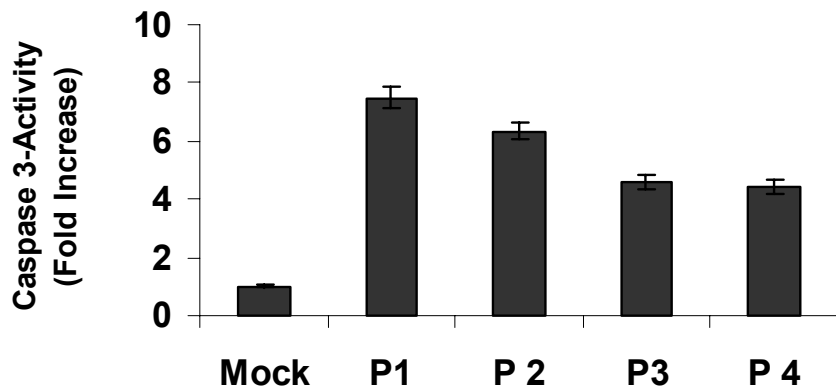

Supplement: MOESM4 [file 9541188]
